# Supplementary material
Source: PubMed Central journal article supplement (PMC3341010)
Supplement: 1120742109_pnas.201120742SI.pdf [file 1120742109_pnas.201120742SI.pdf]

# Supporting Information

Melamed-Bessudo and Levy 10.1073/pnas.1120742109

Table S1. Effect of *ddm1-2* mutant on female meicyte recombination

|                  | Seed phenotype                              |      |     |       |       | Recombinant (%) |
|------------------|---------------------------------------------|------|-----|-------|-------|-----------------|
|                  | Both                                        | None | Red | Green | Total |                 |
| BC1 male meicyte | Female meicyte (WT × Col3-4/20)             |      |     |       |       |                 |
| WT1              | 25                                          | 17   | 3   | 4     | 49    |                 |
| WT2              | 30                                          | 32   | 1   | 4     | 67    |                 |
| WT3              | 13                                          | 14   | 0   | 1     | 28    |                 |
| WT4              | 5                                           | 7    | 1   | 1     | 14    |                 |
| WT5              | 109                                         | 96   | 6   | 11    | 222   |                 |
| <i>ddm1-2_1</i>  | 7                                           | 8    | 1   | 1     | 17    |                 |
| <i>ddm1-2_2</i>  | 16                                          | 14   | 2   | 0     | 32    |                 |
| <i>ddm1-2_3</i>  | 18                                          | 24   | 2   | 3     | 47    |                 |
| <i>ddm1-2_4</i>  | 11                                          | 15   | 0   | 0     | 26    |                 |
| Total            | 234                                         | 227  | 16  | 25    | 502   | 8.2             |
| BC1 male meicyte | Female meicyte ( <i>ddm1-2</i> × Col3-4/20) |      |     |       |       |                 |
| WT1              | 15                                          | 9    | 4   | 3     | 31    |                 |
| WT2              | 11                                          | 13   | 2   | 2     | 28    |                 |
| WT3              | 18                                          | 17   | 5   | 2     | 42    |                 |
| <i>ddm1-2_1</i>  | 51                                          | 44   | 13  | 6     | 114   |                 |
| <i>ddm1-2_2</i>  | 4                                           | 8    | 0   | 2     | 14    |                 |
| <i>ddm1-2_3</i>  | 12                                          | 7    | 3   | 4     | 26    |                 |
| <i>ddm1-2_4</i>  | 6                                           | 4    | 1   | 2     | 13    |                 |
| <i>ddm1-2_5</i>  | 22                                          | 22   | 0   | 6     | 50    |                 |
| <i>ddm1-2_6</i>  | 10                                          | 10   | 0   | 0     | 20    |                 |
| <i>ddm1-2_7</i>  | 4                                           | 3    | 2   | 1     | 10    |                 |
| <i>ddm1-2_8</i>  | 20                                          | 20   | 3   | 3     | 46    |                 |
| <i>ddm1-2_9</i>  | 38                                          | 30   | 4   | 9     | 81    |                 |
| <i>ddm1-2_10</i> | 7                                           | 5    | 1   | 1     | 14    |                 |
| <i>ddm1-2_11</i> | 21                                          | 16   | 1   | 4     | 42    |                 |
| <i>ddm1-2_12</i> | 2                                           | 5    | 2   | 0     | 9     |                 |
| Total            | 241                                         | 213  | 41  | 45    | 540   | 16              |

**Table S2. Effect of *ddm1-2* mutant on male meiocyte recombination**

|                     | Seed phenotype |      |                                            |       |       | Recombinant (%) |
|---------------------|----------------|------|--------------------------------------------|-------|-------|-----------------|
|                     | Both           | None | Red                                        | Green | Total |                 |
| BC1 female meiocyte |                |      | Male meiocyte (WT × Col3-4/20)             |       |       |                 |
| WT1                 | 4              | 6    | 5                                          | 1     | 16    |                 |
| WT2                 | 23             | 20   | 8                                          | 7     | 58    |                 |
| WT3                 | 4              | 3    | 1                                          | 1     | 9     |                 |
| WT4                 | 7              | 6    | 3                                          | 0     | 16    |                 |
| WT5                 | 15             | 13   | 4                                          | 1     | 33    |                 |
| WT6                 | 18             | 19   | 3                                          | 5     | 45    |                 |
| WT7                 | 14             | 12   | 3                                          | 3     | 32    |                 |
| WT8                 | 7              | 10   | 3                                          | 2     | 22    |                 |
| WT9                 | 12             | 7    | 3                                          | 5     | 27    |                 |
| WT10                | 15             | 8    | 4                                          | 5     | 32    |                 |
| WT11                | 9              | 7    | 2                                          | 1     | 19    |                 |
| <i>ddm1-2_1</i>     | 11             | 6    | 3                                          | 4     | 24    |                 |
| <i>ddm1-2_2</i>     | 13             | 10   | 3                                          | 3     | 29    |                 |
| <i>ddm1-2_3</i>     | 13             | 12   | 4                                          | 4     | 33    |                 |
| <i>ddm1-2_4</i>     | 11             | 13   | 2                                          | 6     | 32    |                 |
| <i>ddm1-2_5</i>     | 14             | 16   | 2                                          | 5     | 37    |                 |
| Total               | 190            | 168  | 53                                         | 53    | 464   | 22.8            |
| BC1 female meiocyte |                |      | Male meiocyte ( <i>ddm1-2</i> × Col3-4/20) |       |       |                 |
| WT1                 | 26             | 18   | 9                                          | 11    | 64    |                 |
| WT2                 | 17             | 10   | 10                                         | 6     | 43    |                 |
| WT3                 | 18             | 13   | 8                                          | 7     | 46    |                 |
| WT4                 | 21             | 22   | 5                                          | 8     | 56    |                 |
| WT5                 | 8              | 9    | 4                                          | 5     | 26    |                 |
| WT6                 | 10             | 11   | 7                                          | 4     | 32    |                 |
| WT7                 | 5              | 6    | 3                                          | 2     | 16    |                 |
| <i>ddm1-2_1</i>     | 6              | 5    | 5                                          | 3     | 19    |                 |
| <i>ddm1-2_2</i>     | 5              | 9    | 3                                          | 4     | 21    |                 |
| <i>ddm1-2_3</i>     | 6              | 5    | 5                                          | 4     | 20    |                 |
| <i>ddm1-2_4</i>     | 16             | 12   | 9                                          | 8     | 45    |                 |
| <i>ddm1-2_5</i>     | 10             | 10   | 3                                          | 6     | 29    |                 |
| <i>ddm1-2_6</i>     | 17             | 24   | 12                                         | 10    | 63    |                 |
| <i>ddm1-2_7</i>     | 12             | 12   | 3                                          | 7     | 34    |                 |
| <i>ddm1-2_8</i>     | 16             | 11   | 3                                          | 8     | 38    |                 |
| Total               | 193            | 177  | 89                                         | 93    | 552   | 33              |

**Table S3. Effect of *met1-3* mutant on female meiocyte recombination**

|                   | Seed phenotype |      |                                              |       |       | Recombinant (%) |
|-------------------|----------------|------|----------------------------------------------|-------|-------|-----------------|
|                   | Both           | None | Red                                          | Green | Total |                 |
| BC1 male meiocyte |                |      | Female meiocyte (WT × Col3-4/20)             |       |       |                 |
| WT1               | 114            | 103  | 7                                            | 12    | 236   |                 |
| WT2               | 30             | 32   | 1                                            | 4     | 67    |                 |
| WT3               | 25             | 17   | 3                                            | 4     | 49    |                 |
| <i>met1-3_1</i>   | 20             | 21   | 3                                            | 2     | 46    |                 |
| <i>met1-3_2</i>   | 10             | 8    | 1                                            | 2     | 21    |                 |
| Total             | 199            | 181  | 15                                           | 24    | 419   | 9.3             |
| BC1 male meiocyte |                |      | Female meiocyte ( <i>met1-3</i> × Col3-4/20) |       |       |                 |
| WT1               | 10             | 12   | 2                                            | 2     | 26    |                 |
| WT2               | 23             | 37   | 2                                            | 0     | 62    |                 |
| WT3               | 5              | 4    | 1                                            | 0     | 10    |                 |
| <i>met1-3_1</i>   | 35             | 29   | 7                                            | 6     | 77    |                 |
| <i>met1-3_2</i>   | 28             | 19   | 4                                            | 4     | 55    |                 |
| <i>met1-3_3</i>   | 40             | 30   | 5                                            | 3     | 78    |                 |
| <i>met1-3_4</i>   | 44             | 47   | 4                                            | 7     | 102   |                 |
| <i>met1-3_5</i>   | 26             | 22   | 0                                            | 1     | 49    |                 |
| Total             | 211            | 200  | 25                                           | 23    | 459   | 10.5            |
